# Supplementary material
Source: Springer Nature journal article supplement (https://www.springermedizin.de/resource/supplementary/12889_2009_2513_MOESM1_ESM.pdf/9486228)
Supplement: MOESM1 [file 9486228]

**Oslo: 10th graders, age 15/16 yrs in 2001.**  
Number on class lists and invited: N = 4273

**Hedmark: 10th graders, age 15/16 yrs in 2001**  
On class lists and invited: N = 2197

**Total number of participants:**  
N = 3811 (89.2%) **SAMPLE 1**

**Total number of participants:**  
N = 1939 (88.3%) **SAMPLE 2**

**Oslo: School-based: 13th graders aged 18/19 yrs in 2004 (based on class lists)**  
Received invitation: N= 3659

**Oslo: Postal-based: age 18/19 yrs in 2004 (were not on class lists; with consent to be invited to a follow-up; and known address)**  
Received invitation: N =1084<sup>b</sup>

**Hedmark: Postal-based, age 18/19 yrs in 2004 (with consent to be invited to a follow-up; and known address)**  
Received invitation: N = 1683<sup>c</sup>

New individuals:  
n = 1193

n = 2466<sup>a</sup>

Non-responders:  
n = 154

Non-responders:  
n = 197

Non-responders:  
n = 618

Non-responders:  
n = 750

**Participants in cross-sectional, school-based:**  
n = 3308 (90.4%)  
**SAMPLE 3**

Responded:  
n = 2269, of whom 164 lack consent to link with baseline data

Participants in follow-up, school-based:  
n = 2105 with consent to link with baseline data

Responded:  
n = 466, of whom 82 lack consent to link with baseline data

Responded:  
n = 933, of whom 106 lack consent to link with baseline data

**Participants in follow-up, Oslo total:**  
n = 2489 (65.3%) with consent to link with baseline data  
**SAMPLE 4**

Participants in follow-up, postal-based:  
n = 384 with consent to link with baseline data

**Participants in follow-up:**  
n = 827 (42.7%) with consent to link with baseline data  
**SAMPLE 5**
